# Supplementary material
Source: PubMed Central journal article supplement (PMC6644620)
Supplement: ao8b00827_si_001.pdf [file ao8b00827_si_001.pdf]

## Supporting information (Tables and figures)

### Co-regulation of biosynthetic genes and transcription factors for aporphine-type alkaloid production in wounded lotus provides insight into the biosynthetic pathway of nuciferine

Thitirat Meelaph<sup>†,§</sup>, Khwanlada Kobtrakul<sup>†,▽</sup>, N.Nopchai Chansilpa<sup>⊥</sup>, Yuepeng Han<sup>‡</sup>, Dolly Rani<sup>†,▽</sup>, Wanchai De-Eknamkul<sup>†,▽</sup>, Sornkanok Vimolmangkang<sup>\*,†,▽</sup>

<sup>†</sup>Research Unit for Natural Product Biotechnology, Faculty of Pharmaceutical Sciences, Chulalongkorn University, Bangkok 10330, Thailand

<sup>‡</sup>Key Laboratory of Plant Germplasm Enhancement and Specialty Agriculture, Wuhan Botanical Garden of the Chinese Academy of Sciences, Wuhan, 430074, P.R. China

<sup>§</sup>Department of Biochemistry and Microbiology, Faculty of Pharmaceutical Sciences, Chulalongkorn University, Bangkok 10330, Thailand

<sup>⊥</sup>Faculty of Agriculture and Natural Resources, Rajamangala University of Technology Tawan-ok, Chonburi 20110, Thailand

<sup>▽</sup>Department of Pharmacognosy and Pharmaceutical Botany, Faculty of Pharmaceutical Sciences, Chulalongkorn University, Bangkok 10330, Thailand

\*Corresponding author:

Sornkanok Vimolmangkang; E-mail: Sornkanok.v@pharm.chula.ac.th

Postal address: Faculty of Pharmaceutical Sciences, Chulalongkorn University, Bangkok 10330, Thailand

**Table S1.** Primers for amplification of cDNA fragments of *NnCNMT* and *NnOMT* genes in lotus

| Target genes | Forward Primer (5'-3')                | Reverse Primer (5'-3')                      | Template           |
|--------------|---------------------------------------|---------------------------------------------|--------------------|
| CNMT         | ATGGATGCGTTGATCCAG<br>GTACC           | TTAATTTATTTTTTTCTTGAATAGGAAC<br>A           | NNU_11880          |
| 6OMT         | ATGGAAATTCAGAAGGAAG<br>TTCAAGCAGCCGAC | CTAATAAGGATAGGCCTCAATTACAGA<br>TTGAACGGCAGC | NNU_19035          |
|              | GAAGGAAGTTCAAGCAGCC<br>GAC            | GATGTGAGGAGCCTGGTCGT                        | NNU_03165          |
|              | ATGGAAATTCCGAAGGAAG<br>TTCAAGCT       | GAGAGAAGGCTAATAAGGATAGGCCA<br>T             | NNU_03166          |
|              | GAGGAGAATGGAAATTCA<br>GAAGGAAGG       | CTAATAAGGATAGGCCACAATTACAG                  | NNU_23168          |
| CYP80<br>G2  | CTCATGTGGCTGCTGTGG<br>AA              | GCTTGAATATCCAACATCTTGGTAGAG                 | XM_0102556<br>88.1 |

**Table S2.** A list of putative BIA-related gene retrieved from coding sequences of *Nelumbo nucifera*

| Gene code | Sequences (5'-3')                                                                                                                                                                                                                                                                                                                                                                                                                                                                                                                                                                                                                                                                                                                                                                                                                                                                                                                                                                                                                                                                                                                                                                                                                                                                                                                                                                                                           |
|-----------|-----------------------------------------------------------------------------------------------------------------------------------------------------------------------------------------------------------------------------------------------------------------------------------------------------------------------------------------------------------------------------------------------------------------------------------------------------------------------------------------------------------------------------------------------------------------------------------------------------------------------------------------------------------------------------------------------------------------------------------------------------------------------------------------------------------------------------------------------------------------------------------------------------------------------------------------------------------------------------------------------------------------------------------------------------------------------------------------------------------------------------------------------------------------------------------------------------------------------------------------------------------------------------------------------------------------------------------------------------------------------------------------------------------------------------|
| NnCNMT1   | <p>ATGGATGCGTTGATCCAGGTACCATACGATGCAACTGTACGTTTAATGCTG<br/> TCGTCTCTCGAGCGTAACCTCCTCCCCGACGTCGTCATAAGGAGGCTCAC<br/> GCGGCTGCTGTTGGCTAGCCGTCCTCGTTGGGGATACAAGCCGTCCTCTC<br/> AACTCCAACCTTTCTGATCTTCTCCAATTTGTTCACTCGCTAAAAGATATGCC<br/> CATTGCCATCAAGACCGACTTACCAAAGTCCCAACATTATGAATTACCCACT<br/> TCCTTCTTCAAGCTGGTTTTAGGGAAGAATCTCAAATACAGCTGCTGTTACT<br/> TCCTTGACAAGTCAAGCACCTTAGAGGATGCAGAGAAAGCTATGCTGGAG<br/> CTGTACTGTGAGAGGGCACAGATCAAAGATGGCCAATCTGTGCTTGATGTT<br/> GGTTGTGGCTGGGGATCATTGTCCTTGATATTGCACAAAAGTTTTCTAGCT<br/> GCAGGATAACAGGGATTTGCAATTCAAAGACACAGAAAGCATATATAGAGG<br/> AGCAATGTAGGGAAGTGAAGCTGCAAAATGTGGAGATCATTGTTGCAGATA<br/> TCAGCACTTTTGAAATGGAGGCATCATTTGATAGGATTTTATCCATAGAAAT<br/> GTTTGAACACATGAAGAACTACAAGGCACTTCTTAATAAGATATCAAATGG<br/> ATGAAGGAGGATAGCCTCCTTTTATTTAACTACTTCTGCCATAAAGCATTG<br/> CTTACCACTTTGAGGACAAGAATGAAGATGACTGGATTACCAGGTACTTCT<br/> TCACTGGAGGGACAATGCCTGCTGCAAACCTTCTCCTCTATTTCCAGGATG<br/> ATGTTTCTGTTGTCAACCATTGGCTTGTAATGGGAACCATTATGCAAGAAC<br/> AAGTGAGGAGTGGCTTAAAGAATGGACCAGAACATGGCTTCTATTAAGCC<br/> AATAATGGAGTCAACTTATGGCAAGGATTCCGCTGTTAAGTGGACTGCCTA<br/> TTGGCGTACATTCTTCATCTCAGTGGCAGAACTGTTTGGCTATAACAATGG<br/> AGAAGAATGGATGGTTGCACTGTTTCTATTCAAGAAAAAATAAATTA</p>                                                                                                                                                                                 |
| NnCNMT2   | <p>ATGGATGCGTTGATCCAGGTACCATACGATGCAACTGTACGTTTAATGTTG<br/> TCGTCTCTCGAGCGTAACCTCCTCCCCGACGTCGTCATAAGGAGGCTCAC<br/> GCGGCTGCTGTTGGCTAGCCGTCCTCGTTGGGGATACAAGCCGTCCTCTC<br/> AACTCCAACCTTTCTGATCTTCTCCAATTTGTTCACTCGCTAAAAGATATGCC<br/> CATTGCCATCAAGACCGACTTACCAAAGTCCCAACATTATGAATTACCCACT<br/> TCCTTCTTCAAGCTGGTTTTAGGGAAGAATCTCAAATACAGCTGCTGTTACT<br/> TCCTTGACAAGTCAAGCACCTTAGAGGATGCAGAGAAAGCTATGCTGGAG<br/> CTGTACTGTGAGAGGGCACAGATCAAAGATGGCCAATCTGTGCTTGATGTT<br/> GGTTGTGGCTGGGGATCATTGTCCTTGATATTGCACAAAAGTTTTCTAGCT<br/> GCAGGATAACAGGGATTTGCAATTCAAAGACACAGAAAGCATATATAGAGG<br/> AGCAATGTAGGTAAGTTGCATGAAATACACAATATGTTCTGTTAGATCCCTT<br/> ATTTGATCTTCTGGACCAGTAACAAAAGGGTTACAAGGCGCTGAAAACAGT<br/> TACGGATGGCAAAGTTGCATCTACAAGAACCACAGCTTCAAACCTCTACTT<br/> TTTCTGTTTGAATCAACATATCACAGCACTTCTACTTCTACAAGATGATTG<br/> AAGTTCCATTAGCTCATTCTGTTTGGTCCATTTATAACTACAGGTGCAT<br/> GCTTTCTGAAAATGGTGAATTCATCTCTGCAACCTAAGATAACCCACACATT<br/> TTCATCTTATACAGGGAAGTGAAGCTGCAAAATGTGGAGATCATTGTTGCA<br/> GATATCAGCACTTTTGAAATGGAGGCATCATTTGATAGGATTTTATCCATAG<br/> AAATGTTTGAACACATGAAGAACTACAAGGCACTTCTTAATAAGATATCAA<br/> ATGGATGAAGGAGGATAGCCTCCTTTTAGTTAACTACTTCTGCCATAAAGC<br/> ATTTGCTTACCACTTTGAGGACAAGAATGAAGATGACTGGATTACCAGGTA<br/> CTTCTTCACTGGAGGGACAATGCCTGCTGCAAACCTTCTCCTCTATTTCCA<br/> GGATGATGTTTCTGTTGTCAACCATTGGCTTGTAATGGGAACCATTATGCA<br/> AGAACAAGTGAAGGAGTGGCTTAAAGAATGGACCAGAACATGGCTTCTATT</p> |

|          |                                                                                                                                                                                                                                                                                                                                                                                                                                                                                                                                                                                                                                                                                                                                                                                                                                                                                                                                                                                                                                                                                                                                                                                                                                                                                                                                                            |
|----------|------------------------------------------------------------------------------------------------------------------------------------------------------------------------------------------------------------------------------------------------------------------------------------------------------------------------------------------------------------------------------------------------------------------------------------------------------------------------------------------------------------------------------------------------------------------------------------------------------------------------------------------------------------------------------------------------------------------------------------------------------------------------------------------------------------------------------------------------------------------------------------------------------------------------------------------------------------------------------------------------------------------------------------------------------------------------------------------------------------------------------------------------------------------------------------------------------------------------------------------------------------------------------------------------------------------------------------------------------------|
|          | AAGCCAATAATGGAGTCAACTTATGGCAAGGATTCCGCTGTTAAGTGGACT<br>GCCTATTGGCGTACATTCTTCATCTCAGTGGCAGAAGTGTGGCTATAAC<br>AATGGAGAAGAATGGATGGTTGCACTGTTCCCTATTCAAGAAAAAATAAATT<br>AA                                                                                                                                                                                                                                                                                                                                                                                                                                                                                                                                                                                                                                                                                                                                                                                                                                                                                                                                                                                                                                                                                                                                                                                     |
| NnCNMT3  | ATGGATGCGTTGATCCAGGTACCATACGATGCAACTGTACGTTTAATGCTG<br>TCGTCTCTCGAGCGTAACCTCCTCCCCGACGTCGTCATAAGGAGGCTCAC<br>GCGGCTGCTGTTGGCTAGCCGTCTTCGTTGGGGATACAAGCCGTCCTCTC<br>AACTCCAACCTTTCTGATCTTCTCCAATTTGTTCACTCGCTAAAAGATATGCC<br>CATTGCCATCAAGACCGACTTACCAAAGTCCCAACATTATGAATTACCCACT<br>TCCTTCTTCAAGCTGGTTTTAGGGAAGAATCTCAAATACAGCTGCTGTTACT<br>TCCTTGACAAGTCAAGCACCTTAGAGGATGCAGAGAAAGCTATGCTGGAG<br>CTGACTGTGAGAGGGCACAGATCAAAGATGGCCAATCTGTGCTTGATGTT<br>GGTTGTGGCTGGGGATCATTGTCCTTGATATTGCACAAAAGTTTTCTAGCT<br>GCAGGATAACAGGGATTTGCAATTCAAAGACACAGAAAGCATATATAGAGG<br>AGCAATGTAGTTACGGATGGCAAAGTTGCATCTACAAGAACCACAGCTTCA<br>AACCTCTACTTTTTCTGTTTGAATCAACATATCACAGCACTTCCTACTTCTAC<br>AAGATGATTGAAGTTCATTAGCTCATTCTGTTTGGTCCATATTTATAACTA<br>CAGGGAAGTGAAGCTGCAAAATGTGGAGATCATTGTTGCAGATATCAGCAC<br>TTTTGAAATGGAGGCATCATTGATAGGATTTTATCCATAGAAATGTTTGAA<br>CACATGAAGAACTACAAGGCACTTCTTAATAAGATATCAAAATGGATGAAG<br>GAGGATAGCCTCCTTTTAGTTAACTACTTCTGCCATAAAGCATTGCTTACC<br>ACTTTGAGGACAAGAATGAAGATGACTGGATTACCAGTACTTCTTCACTG<br>GAGGGACAATGCCTGCTGCAAACCTTCTCCTCTATTTCCAGGATGATGTTT<br>CTGTTGTCAACCATTGGCTTGTAATGGGAACCATTATGCAAGAACAAGTG<br>AGGAGTGGCTTAAAAGAATGGACCAGAACATGGCTTCTATTAAGCCAATAA<br>TGGAGTCAACTTATGGCAAGGATTCCGCTGTTAAGTGGACTGCCTATTGGC<br>GTACATTCTTCATCTCAGTGGCAGAAGTGTGGCTATAACAATGGAGAAG<br>AATGGATGGTTGCACTGTTCCCTATTCAAGAAAAAATAAATTA |
| Nn6OMT35 | ATGGAAAATCAGAAGGAAGTTCAAGCAGCCGAGGCTAAAATCTGGAATTC<br>GTCTATGGCTTTGCCGACACTTTAGTCCTCCGATGTGCCATTGAGCTGGGT<br>ATTGCAGACATAATCCATAAGCAGGGAGAACCCTTGACGCTCTCTGAACTG<br>GGGGCTCAAATTCCTCTGAAGTCGGTCAACACCGACCACTTGACAGGTTA<br>ATGCGTTACTTGGTGCACATGAAGCTCTTACCAAGGAAACCCTAGATGGC<br>GAAGCTCGATATGGGCTGGCTCCACCGGCTAAGTTGCTTGTAATGGTG<br>GGAGGACAAGGGCTTGGCGTCAATCATATTTGGGATCACTGACAAGGATTT<br>CATAGCACCTGGCACCATCTCAAGGATAGCTTGGCCGGCGATGGCGAGG<br>AGACAACCTTTGAGAAGGTGTTAGGGAAGAGCATATCGACATACATGGCTG<br>ATCATCTGGAGAAGAGTATGTTGTTCAATGAATCAATGGTTCATGATACCAG<br>GCTCTTACATCAGTCTTGATTCAAGACTTCAAGGATGTATTCCAAGGAATT<br>AAGTCGTTGGTGGATGTTGGTGGAGGCTCTGGAAGTGCATGGGAGCCAT<br>TGCCAAGGCCTTTCCCCACCTAAAATGTACAATTTATGGTCTACCTCATGTC<br>ATTGCCGACTCCCCTGATTACCCTGAGGTGACCGGATTTCCAGGCGACAT<br>GTTCAAACACATTCCCAGTGCCGATGCCATCTTATTGAAGTGCATCCTCCA<br>TACTGGGGTGATGGTCAATGCATTGAAATCTAAAGAGATGCAAAGAATC<br>AGTGCTAGAGAGGGTGGAAATAGTTATCATCGCCGACGCAGTAGTAGATTT<br>GGAATCTAAGCATCCCTACTTAACAAAACCTTTACTAAGCACGGATTTGGAC<br>ATGATGCTCAACACTGGAGGAAAAGAGAGGACTGAGGCAGAAATGGAAGAA<br>GCTTTTTAATGCTGCAGGGTCCCTGCATATAAGATTACACATGTAGCTGAC<br>GTTGAGTACTCTGTAATTGAGGCCTATCCTTATTAG                                                                                                                                                                                     |

|          |                                                                                                                                                                                                                                                                                                                                                                                                                                                                                                                                                                                                                                                                                                                                                                                                                                                                                                                                                                                                                                                                                                                                                                                                                |
|----------|----------------------------------------------------------------------------------------------------------------------------------------------------------------------------------------------------------------------------------------------------------------------------------------------------------------------------------------------------------------------------------------------------------------------------------------------------------------------------------------------------------------------------------------------------------------------------------------------------------------------------------------------------------------------------------------------------------------------------------------------------------------------------------------------------------------------------------------------------------------------------------------------------------------------------------------------------------------------------------------------------------------------------------------------------------------------------------------------------------------------------------------------------------------------------------------------------------------|
| Nn6OMT65 | <p>ATGGAAATTCAGAAGGAAGTTCAAGCAGCCGACGTTGAAATCAGGAAATTC<br/> GGTTATGGCTTTGCCGACATTTTAGTCATCCGATGTGCCATTGAGCTCGGA<br/> ATTGCAGACATAATCCATAAGCAGGGGGAACCCTTGACGCTCTCTGAACTG<br/> GAGGCTCAAATTCCTGTGAAACCGGTCAACACCGATCACTTGCACAGGTTA<br/> ATGCGTTACATGGTGCACATGAAGATCTTCACCAAGGAAACCCCTGATGGC<br/> GAAGAACGATATGGGCTGGCTCCACTGGGTAAGTTCCTTGTAATGGGTG<br/> GGACAGGAACATGGTGTGAGCCATATTAGCGGTCACTGACAAGGATTTTCAT<br/> GGTACCCTGGTACCGTCTCAAGGATAGCTTGGTCGGCGAGGGGACAGCTT<br/> TTGAGAAGGCGTTAGGGAAGACCATATGCGAATGCATGGCTGATCATCCG<br/> GAGAAGAAAAGCCCTTCAATGAAGCAATGGCTTGTGATACGACCAGGCTC<br/> CTCACATCAGCCTTGATTCAAGACTGCAAGGATTTATTCCAAGGAATAATGT<br/> CGTTGGTGGATGTTGGTGGAGGCACTGGAAGTCCCATGAGAGACATTGCC<br/> AAGACCTTTCCCCACCTAAAATGTACAATTTATGATCTACCTCATGTCATTG<br/> CCGACTCCCGGATTACCCTGAGGTGACCGGATTGCAGGCAACATGTTCC<br/> AAACACATTCTAGTGCCGATGGCATCTTGTGAAGTGCATCCTCCATGAC<br/> TTGGGTGACCGTCAATGCATTGAAATTCTACAGCGATGCAAAGAATCAGTG<br/> CCTAGAGAGGGTGGAAAAGTTATCATCGTCGACATAGTACTAGATCCGGAA<br/> TCTACGGATCCCTTAACAAAGGCCAGATTAAGGTTGGATTTGGACATGATG<br/> GTCTACACTGGAGGAAAAGAGAGGAGTGAGGCAGAATGGAAGAAGCTTTT<br/> GAATGCTGCAGGGTTCCTCGATATAAGATTTTACATATAGCTGCCGTTCA<br/> ATCTGTAATTGAGGCCTATCCTTATTAG</p> |
| Nn6OMT66 | <p>ATGGAAATTCGAAGGAAGTTCAAGCTGACGAGGTTGAAATCTGGAAATTC<br/> GGATATGACTTTGCCGACACTTTAGTCCTCCGATGTGCCATTGAGTTCGGT<br/> ATTGCAGACATAATCCATAAGCAGGGAGAACCCTTGACGCTCTTTGAACTG<br/> GGGGCTCAAATTCCTGTGCAACCAGTCAACACCGATCACTTGCACAGGTTA<br/> ATGCGTTACATGGTGCACATGAAGATCTTCACCAAGGAAACCCCTAGGTGGC<br/> GAAGAACAATATGGGCTATCTCCACACGGTAAGTTCCTTGTAAGGGTGG<br/> GACAAGAGCATGGCGTCAGCCATATTAGCGATCACTGACGAGGATTTCTTT<br/> GCACCCTGGCACTGTCTCAAGGATGTCTTGGCCGGCGAGGGGACAGCTTT<br/> TGAGAAGGCGTTAGGCAAGAGCATATGGGCATACGTGGCTGATCATCCGG<br/> AGAAGAATAAACTCTTCAATGAAGTAATGGCTTGTGATACCAGTTTCATCAC<br/> ATCAGTCTTGATTCAAGACTGTAAGGATGTATTCCAAGGAATAAAGTCGGT<br/> GGTGGATGTTGGTGGAGGCACTGGAAGTCCCATGAGAGACATTGCCAAGG<br/> CCTTTCCCCACCTAAAATGTACAATTTATGATCTACCTCATGTCATTGCCGA<br/> CTCACCTGATTACCCTGAGGTGACCGGATTGCAGGCGACATGTTCAAACA<br/> CATTCTAGTGCCGATGCCATCTTATTGAAGTGGATCCTCCATGATTGGGA<br/> TGATGGTGAATGTATTGAAATTCTAAAGCGATGCAAGGAATCAGTGCCTAG<br/> AGAGGGTGGAAAAGTTATCATCGTCGACATAGTACTAGATCCGGAATCTAA<br/> GGATCCCTTAACAAAGGCTAGATTAAGGTTGGATTTGGACATGATGGTCTA<br/> CACTGGAGGAAAAGAGAGGAGTGAGGCAGAATGGAAGAAGCTTTTGAATG<br/> CTGCAGGGTTCCTGGATATAAGATTTTACATGTAGCTGCCGTTCAATCTG<br/> TAATTATGGCCTATCCTTATTAG</p>    |
| Nn6OMT68 | <p>ATGGAAATTCAGAAGGAAGGTCAAGCAGCGGCGGCTAAAATCTGGAAATT<br/> CGTTTATGGCTTTGCCGACTGTTTAGTCCTCCGATGTGCCATTGACCTCGG<br/> AATTGCAGACATAATCCATAAGCAGGGAGAACCCTTGACGCTCTCTGAACT<br/> GGGGGCTCAAATTCCTGTGCAACCAGTCAACACCGATCACTTGCACAGGT<br/> TAATGCGTTACTTGGTGCACATGAAGATCTTCACCAAGGAAACCCCTAGATG<br/> GCGAAGCACGATATGGGCTGGCTCCACCGGCTAAGTTCATTGTAAGGGG<br/> TGGGACAAGAGCATAGTGTCAATCATATTAGTGGTCACCGACAAGGATTT<br/> ATGGCACCCCTGGCACTGCCTCAAGGATAGCTTGTGCGGCGAGGGGACAG<br/> CTTTTGAAGAAGGCGTTAGGGAGGAGCATATGGACATACATGGCTGATCATC</p>                                                                                                                                                                                                                                                                                                                                                                                                                                                                                                                                                                                                                                                                                 |

|        |                                                                                                                                                                                                                                                                                                                                                                                                                                                                                                                                                                                                                                                                                                          |
|--------|----------------------------------------------------------------------------------------------------------------------------------------------------------------------------------------------------------------------------------------------------------------------------------------------------------------------------------------------------------------------------------------------------------------------------------------------------------------------------------------------------------------------------------------------------------------------------------------------------------------------------------------------------------------------------------------------------------|
|        | <p>CGGAGAAGAATAAGCTCTTCAATGAAGGAATGGCTTGTGATACCAAACCTCC<br/> TCATATCAGCCTTGGTTCAAGACTGCAAGGATTTATTCCAAGGAATAATGTC<br/> GTTGGTGGATGTTGGTGGAGGCACTGGAAGTCCATGAGAGCCATTGCCA<br/> AGGCCTTTCCACCTAAAATGTACAATTTATGATCTACCTCATGTCATTGC<br/> CGACTCCCCTGATTACCCTGAGGTCGACCGGATTGCAGGCGACATGTTCA<br/> AACACATTCCTAGTGCCGATGCCATCTTATTGAAGTGCATCCTCCATGACT<br/> GGGATGATGGTGAATGCATTGAAATTCTAAAGCGATGCAAGGAATCAGTGC<br/> CTAGAGAGGGTGGAAAAGTTATCATCGTCGACATAGTAGTAGATTTGGAAT<br/> CTAAGCATCCCTTAACAAAGACTAGACTAAGCTTGGATTTGGACATGATGG<br/> TCACCACTGGAGGAAAAGAGAGGACTGAGGCAGAATGGAAGAAGCTTTTG<br/> AATGCTGCAGGGTCCCTGTATTTAAGATTACACATATATCTGCCGTTCAAT<br/> CTGTAATTGTGGCCTATCCTTATTAG</p>                        |
| WRKY1  | <p>ATGACTCCGGCAATAGCAGCAGCACTCAAGCTGAAGGGACTAGCAGGAGT<br/> AACATGCAAGCGACGGGAACTAATAAGGCTGTTGGAGCAAGAGTTGTATT<br/> TAGAACAAAACCGAGCTAGATATTATGGACGACGGCTTCAAGTGGAAAGAA<br/> GTATGGGAAGAAGATGGTGAAGAACAGACCATTTCCAAGGAACTACTACAG<br/> GTGTTCCGGTGGAAAGGATGCCAGTGAAGAAGAGAATAGAAAGAGATGCAG<br/> ACGATCCACAGCACGTGATAACGACATACGAAGGCACCCACAACCACGAA<br/> AGCCCTCGGCCTGA</p>                                                                                                                                                                                                                                                                                                                                 |
| WRKY 2 | <p>ATGAATATTGCCAGAATTTGTCTATCGATATCGAGATGTCTAATCGTCATC<br/> CGACTCCAGCCGGAATTTACCGGAAAAAATCTCCCATCATCTCCTAAACT<br/> TCGAATTCCCGACTACCTGGACTTGAACCAATGGTTTGAAGGAGACACAG<br/> CATCTGTCACTCATGATCTTCTAATCAGGATTTGATCCTTCCAATGCCCAA<br/> CATCGTCGGTCCGGCAAGAATGGCAGTCAAGCTGAAGTCTCTAGCCCGA<br/> GCAACATGCAATGTTACTTTCTTCTGTGTGCAGCTTTGGAATTTTCTTTCTT<br/> TCTGTATCAATTAACCTGGTATTTGTTTTCATGTTGTCAGGGGACGTCGTA<br/> GTGCAACCAGAAATCCGTTCTGGCTAGAGTTGCATTGAGAATAAAAACCG<br/> AGAAAGATATCTTAGACGATGGATTCAAGTGGAAAGAAGTATGGAAAGAAGA<br/> TGGTGAAGAACAACCATATCCAAGGAACTACTTCCGGTGTTCAGTTGAAG<br/> GATGTCCAGTTAAGAAGAGAATAGAAAGAGATGCAGACGACCCACGCCAT<br/> GTGATAACTACATATGAAGGCACCCATAACCACGAAAGCCCTTTTCTCTGA</p> |
| WRKY 3 | <p>ATGGATGTAGGCTCCAGAGTTGCATTGAGAACCAATCTGAGCTTGAGGTC<br/> ATCGACGATGGATTTAAATGGAGAAAGTACGGGAAGAAGACGGTGAAGAA<br/> CAGTCCAAACCCGAGGAATTACTATCGCTGCTCAAGTGGAGGATGCAATGT<br/> GAAGAAGAGAGTGGAAAGAGACCGTGAGGACTCGAGGTATGTGATAACGA<br/> CGTATGAGGGTGTGCACAATCATGAAAGCCCGTGTGTGGTTTATTACAACG<br/> AAATGCCATTAATGGTTCCTAGTGGATGGACTTTGCAAGCTTCACATTCACA<br/> CTCATCATCCTCTTGA</p>                                                                                                                                                                                                                                                                                                                              |
| WRKY 4 | <p>ATGGAAGGAGAAGCCCCACCACTACTGCCACCATTGTCGTCCCACAATAAC<br/> CCATCTTACATCTTGACACCCTCACTTGCATCCACGTCATTGCACCCTCCTC<br/> TTCTTTATCAACCTTATAACCTGCTGCAAGGTTCCAATATCCTACCAGACAT<br/> CGACTGGGTTAGCCTCCTCTCTTCGCCATTTGGATTTGGCGATCTGCAGAA<br/> GCCACTCTTGTGCAATGCAGATGTGACAACTAGAAGTGGAAATAAAGCCGA<br/> AGATGAAAAGAGTGGTAAAGATAAGGTAATAATCGAGCAGGATGAAGAAGG<br/> CAAGTCGGCCGAGGTTTTCGTTCCAGACGCGGAGCACAGAAGATATTCTC<br/> GATGATGGTTACCGCTGGAGGAAATACGGGCAGAAAGCTGTGAAGAACAG<br/> CAACTTTCCAGGAGTTATTATCGCTGCACGCATCATACATGCAATGTGAA<br/> GAAGCAGGTTCAACGACTGTCAAAGGACACAAGCATCGTCGTGACAACATA<br/> TGAAGGCATACACAACCATCCATGTGAGAACTAATGGAGAGTTTGAAGTCC</p>                                                      |

|        |                                                                                                                                                                                                                                                                                                                                                                                                                                                                                                                                                                                                                                                                                                                                                                                                                                                                                                                                                                                                                                          |
|--------|------------------------------------------------------------------------------------------------------------------------------------------------------------------------------------------------------------------------------------------------------------------------------------------------------------------------------------------------------------------------------------------------------------------------------------------------------------------------------------------------------------------------------------------------------------------------------------------------------------------------------------------------------------------------------------------------------------------------------------------------------------------------------------------------------------------------------------------------------------------------------------------------------------------------------------------------------------------------------------------------------------------------------------------|
|        | TCTTCTGAAGCAAATACAGTTCCTCTCT                                                                                                                                                                                                                                                                                                                                                                                                                                                                                                                                                                                                                                                                                                                                                                                                                                                                                                                                                                                                             |
| WRKY 5 | ATGGACATGGAGAACTACCCAATACTCCTCTCCTCTTCATCATCATCATCGT<br>TAGCAACCGCTATTCCATTCTCATCTAACATGGTGACTTCTCATGTTATTAA<br>CCATCTTCATGGAAACAATCCACCTGGGTTCTTAGGATTGAAGTCGGAGAT<br>GGATACCCCACTTAGCTCCGACGACTTTACAACCACCCTTCCTCAGATTCA<br>GAGCTTTGGTGGGCCTAAAAATGAGATGAAACTAGGTATCAAAAAGGGGG<br>AGAAGAAGATTAGAAAGCCCAGATATGCTTTTCAAACAAGAAGCCACGTCTG<br>ATATACTTGATGATGGATATCGATGGAGGAAATATGGCCAAAAGGCTGTGA<br>AGAACAACAATTTCTCGAAGCTACTATCGGTGTACGCACCAAGGATGCA<br>ACGTGAAGAAGCAAGTTCACGGCTATCCAAGATGAAGGAATTGTGGTGA<br>CAACCTACGAAGGGATGCATACCCATCCTATTGAGAAGTCTACCGACAACCT<br>TTGAACACATCTTGAATCAGATGCAAATCTATTCTGCCTTTTAG                                                                                                                                                                                                                                                                                                                                                                                                                        |
| WRKY 6 | ATGGAGAACTATTCAATACTCTTCCCGTGTTTCATCATCATCGTCGGCAGCA<br>GTAGCTGTTCCATTCTCCTCAAACATGGCAAATTCTCGTATTTTTGCTGATC<br>TTAATGACACCAGTCCAGCTGGGTTCTTAGGATTGAAGACGGAGACGGAT<br>GCACATGCACCACGTTTCAGATGTTAAAACCCTTCTTCAGAATGAAAGCTTT<br>GGCCGGCCTAAAAGTGAAACGAAGCTCGGTATCAATAAGAAGGGTGATCA<br>GAAGAAAATCAGAAAACCCAGATATGCTTTTCAAACAAGAAGCCAGGTCGA<br>TATACTTGATGATGGATATCGATGGAGGAAATATGGGCAAAAGGCTGTGAA<br>GAACAACAATTTCTCGGAGCTATTATCGATGTACGCATCAAGGATGCAA<br>TGTCAGAAGCAAGTTCACGCCTATGCAAAGATGAAGGAATCGTCGTGAC<br>AACCTACGAAGGGATGCATACTCATCCAATTGAGAAATCTACGGACAACCT<br>CGAACACATTCTGAGTCAGATGCAAATCTATGCTTCCTTTTAG                                                                                                                                                                                                                                                                                                                                                                                                                           |
| WRKY 7 | ATGGAGAAGAAAGAGACAACAATGGAGACAGATAATTCGATCGGAGCTAC<br>GACATTTTCCGATCAGATTCCAACCACTTTCTCTTTATCCAGCATCTTTGAC<br>ATGTCCTGTGAAGGTGAAAAAGGCTCTTTAGGCATCATGGATTTATTGGGC<br>ATCCAAGATTTCACTCCTTCTATATTCGATTTGCTACAGCAACCGTCGACGC<br>TACTACCACCATCACCACCACCGCCACTACCACCGACGTCATCACTTCCGG<br>AGTCGTCTGAGGTGTTGAATTTGCCAGCAACACCCAACCTTCTTTCGATTT<br>CATCATCATCGACTGAAGCAGCAAATGATGAACAGACCAAAGCAGTGGAAG<br>AGGAGGAGCAGGAGAAGACTAAGAAGCAGCTGAAACCCAAAAAAGAAC<br>CAGAAACGGCAGAGAGAACCGAGATTTGCTTTCATGACAAAGAGCGAGGT<br>CGATCATCTGGAAGACGGGTACAGATGGAGAAAGTATGGACAAAAAGCTG<br>TGAAAAATAGCCCTTTTCCAAGGAGCTACTATCGTTGCACCAGTGCCACAT<br>GCGGTGTGAAGAAGCGAGTGGAGAGATCATCAGATGATCCTTCCATTGTC<br>GTGACAACGTACGAAGGCCAGCACACACATCCAAGCCAGTAATGCCTCG<br>TGGAAGCTCCACCGGAATCTCTTCGGATTCCGGCAGCTACGGTGCGGCCT<br>TTGCCATGCCAATGCAATTGACGCAGTCTCACTTCCAACAACAGCAACAAC<br>AACACAACCCCATTTCCACAACCTTACCACCTTTGAATTTAATTCTAATATT<br>TCTTCGTCTCCTACTTTTTGTACAAGAGAGACGATTTTGCCTTCAGCAGCTT<br>CCTTCCTTAGAGATCATGGCCTTCTTCAAGATGTCGTTCTTCGGATATGAT<br>GATCAAAAAGGAGTAG |
| WRKY 8 | ATGGAGACAGAGAATTCCATTGGAGCAGCAGTTACGGCGTTTTTCGGATCA<br>GATTCACCAACTTCGCTTTATCCAGCATCTTCGACACGCCTTTTCGGAGG<br>TGAAAAATGGTCTCTAGGATTCATGGATTTGTTGGGAGTCCAAGATTTTACC<br>CCATCCATGTTGATTTACTACAGCAACCTTCGATGCCATCACCGCCACCC<br>ATAGTGTGAGTCGGGGAGTACTCCTCCGATATATTGAATTTGCCTGCAACG<br>CCCAACTCTTCTTCATTTTCGTATCATCGACTGAAGCAGCAAATGATGAAC<br>AGTCTAAAGCAGTGGAAGAGGAGGAGCAGGAGAAGACTAAGAACCAACTG                                                                                                                                                                                                                                                                                                                                                                                                                                                                                                                                                                                                                                              |

|         |                                                                                                                                                                                                                                                                                                                                                                                                                                                                                                                                                                                                                                                                                                                                                                                                                                                                                                                                                                                                                                                                                                     |
|---------|-----------------------------------------------------------------------------------------------------------------------------------------------------------------------------------------------------------------------------------------------------------------------------------------------------------------------------------------------------------------------------------------------------------------------------------------------------------------------------------------------------------------------------------------------------------------------------------------------------------------------------------------------------------------------------------------------------------------------------------------------------------------------------------------------------------------------------------------------------------------------------------------------------------------------------------------------------------------------------------------------------------------------------------------------------------------------------------------------------|
|         | AAATCCAACAAGAAGAATAAAAAACGGCAGAAAGAGCCGAGATTTGCTTTC<br>ATGACGAAGAGCGAGGTTGATCATCTGGAAGACGGGTATAGATGGAGAAA<br>GTACGGGCAAAAAGCAGTAAAGAACAGCCCCTTTCCGAGGAGCTACTACC<br>GTTGCACCACTGCCACATGTGGTGTGAAGAAGAGAGTGGAGAGATCGTCC<br>GATGATCCGACCATTGTCGTGACAACGTACGAAGGTCAGCACACACATCC<br>GAGCCCTGTAATGCCTCGTGGAATCTCCACCGGAATCTCTCCGGATTCCA<br>GCAGCTACGCTGCGGCCTTCGCCATGGCGCCGATGCAATTGACGCAACCT<br>CATCATGACTTTCAAGAACAGCAGCAACCCTATTTCCATAACTTATTACCAC<br>CTTCTCTCAACTATAATTCTAGTGTTCCTTTGGCTCCTACTTTTCGTACCAGA<br>GAGACGTTTTTTCACCTTCTGCAACTTCTTTTATCAGAGACCACGGCCTTCTT<br>CAAGACATAGTCCCTTCGGATATGAGAAGTGCTTAG                                                                                                                                                                                                                                                                                                                                                                                                                                                                                           |
| WRKY 9  | ATGGGGACAGTGGAATCTCCGTGGCCGAAAATTCCGCAATCAACCGAAG<br>AAAGGCGATCAACGAGCTTGTCCGTGGCCGTGAATTTACGACCCAGCTTC<br>AAATTATCCTCCGGAATCCCCTCGGAGGTCATGGATCCGTGTCCGGCGGAA<br>GACCTCCTCCAAAAATCTTAACATCGTTCACTGAGGCTATTGCGGCACTC<br>AACACCACTGTGCAATCCGGGGAGGTTTCCCAGAATCCGGCGAGTACCCA<br>TGTAAGTTCGCCCAGTTGCGGTGACCGGGCGACCGAGGATTCCGGTGAGA<br>GCAAAAAGTCTACGGTTCTCAAGGATCGCAGAGGAAGTTATAAGCGAAGAA<br>AGTTGTTGCAGACATGGACAAAGCTCAGCGCTACTCCGATCGATGACGGC<br>CGTGCGTGGCGGAAATACGGCCAGAAAGTGATCCTCAACTCCAAATACCC<br>AAGGA ACTACTACAGGTGTACCCACAAGAACGATCAAGGCTGCCAAGCAA<br>CCAAACAGGTCCAACAACCCGAAGACAACCCGCCATGTATCGGACCACA<br>TACATAGGCGATCACACATGCATAGACATGTCAAAGGCTCCCCGATTCTC<br>CTGGATTCTATCCACAACAACGCTTTTTGTGCTCAGCTTTGAACCCGAAGCT<br>CCGAGGAAGCAAGACCAACCCACCCCTTTTTCTCCTGCTTTTCTCCCTCA<br>ATAAACAGGAATGCAAAGAGGTGGAGATCCCGAGTGACCCGACCCACAA<br>GCAATGTTTCATCGGAATACCATCTTTCCACGATGAAATCACATTCCGGATC<br>GTCCTGCCCCACAACAGTATTGCCGTGACACCCGGGTCCGGATCACGGGG<br>ATGTGATCTCGGGCGTGTACTCAGGTAGCACCAGCTCTCGCAGTCTGGAC<br>AATTATTTTGTGGGGATGAGTGACTTTGATGACGTATTCCACTTTGAAGAGG<br>ACATCTTTCAGGTTTCAATGTAA     |
| WRKY 10 | ATGGACACA ACTGTTGAATCTCCGTGGCCGGGAAATTTCTCTATTGATCGG<br>AAAAGGCTGATCAACAGTCTCGTGCGAGGCCGTGA ACTCACAAACCAACTT<br>CAA ACTATCCTCTGCAATCGCCTCGGACATGAGGATGGGTCCCTGTCCACC<br>GAAGATCTCCTCCCAAGAATCTTACGATCCTTACCGAGGCTATTTCTGCA<br>CTCAAGTCCGCTGACTCCGGAGAGGTCTGTCAGAACCCGTGAGTACGAA<br>TGTGAGTTCGCCCAGTTGTGATGGCCCAAGGACGGAAGATTCCGGCGAGA<br>GCAGGAAGTCTCCAGCAGTCAAGGATCGTAGAGGAGATTATAAGAGAAGA<br>AAGGTTTCTGAGACATGGACAAAGATCACTCCCACTCCCATTGACGACGGC<br>CGTGCGTGGCGAAAATACGGCCAAAAGTGATCCTCAATTGCAAATACCCA<br>AGGAACTATTATAGGTGCACTCACAAAACGACCAAGGATGTGCAGCAACC<br>AAACAAGTACAGCAAATTGAAGATGACCCACCAAAGTATCGAACTATATACA<br>AGGGCCAGCACACATGCAAAGATATATCAAAGCCCCCAATTCATCATGG<br>ACTCTACCCATACAGACTCCTCCTCCTTCGTTCTAAGCTTTCAGTCAGACTC<br>AGACGCTCCAATAACTAACCAGCAGCAGCTCCAGGAGCACCATCCCTTCTT<br>CTCTTCTCTTTCCCCCAATAATAAACAGGAATGCCAGGAAGAAATCCC<br>AAACCATGAGATGGAGGAGCTCACCCACAACCAGCAATCTTCATCACAATA<br>TTTTCTGCCATCTGTCCCTACATCAGCGTTGCCATCCACACCCGGGTCTGA<br>TCATGGGGATGTGATTTCCGGCGTCTACTCGTGTAGCACCAGCTCTACA<br>GTCTGGACATGAGCTTCGTCCGGTGACTTTGATGATGTTTTCCATTTTATGA<br>TGATGACTTTTTTCCGGTTTAA |



|         |                                                                                                                                                                                                                                                                                                                                                                                                                                                                                                                                                                                                                                                                                                                                                                                                                                                                                                                                                                                                                                                                                                                                                                                                                                                                                                                                                                                                                                                                                                                                                                                                                                                                                                   |
|---------|---------------------------------------------------------------------------------------------------------------------------------------------------------------------------------------------------------------------------------------------------------------------------------------------------------------------------------------------------------------------------------------------------------------------------------------------------------------------------------------------------------------------------------------------------------------------------------------------------------------------------------------------------------------------------------------------------------------------------------------------------------------------------------------------------------------------------------------------------------------------------------------------------------------------------------------------------------------------------------------------------------------------------------------------------------------------------------------------------------------------------------------------------------------------------------------------------------------------------------------------------------------------------------------------------------------------------------------------------------------------------------------------------------------------------------------------------------------------------------------------------------------------------------------------------------------------------------------------------------------------------------------------------------------------------------------------------|
| CYP80G2 | <p> ATGGCTCTACTAGTCTCGTTTATTTTCTTCTTACTGTCCATTCTCTCAGTAGT<br/> ACTCTTCCCTTAAACCATCTCCTAATAACCTTCCCCCAGGACCCTTTTCATGG<br/> CCAATTATAGGGACCCTGTTGCCCAAGCTGAAGAAGCAACCCCATGTGCA<br/> GCTAAGCAAATTGGCACAGAGATTTGGTCCACTAATGCTCCTAAAATTTGG<br/> GGTTGAGCCCGTTGTTGTGGCTTCGAGCCATGTTGCAGCCGTGGAGGTGC<br/> TCAAGAATCAGGATCGATTGCTTTCAGGCCGCTTTCACCACACAGCGTCC<br/> GAATTAAGGGCTATATTGAACACTCCATGGTGTGGGCTGATTGCACTGATT<br/> ACTGGAAGATGGTCAGGAAGGTATGGAGGACTGAATTGTTCTCTACTAAGA<br/> TGTTGGACATTCAGGCACACGCCAGAGAGGAGAAAGTATCGGAACTGATG<br/> AAATTTCTCATACGGAAGGAAGGAGAGAAGGTGAATTTTGTCTGATGTGATA<br/> TTCGGTTCCATTTTGAACATATTAGGTGCACTTATTTTCTCAAAGACGTGT<br/> ATGATTTTGAAGACAGGACGGATAATAACTTGGGTATGAAGGGCATGATTC<br/> GGCAGCTGATGATATTGGCAGCCATCCCAAATCTAGCCGACCTCTACCCAA<br/> TTCTTGCCGGATCAGACTTTCAGGGCTTGAGGAAGGCATCGGCAGCGTGT<br/> GTCAAGCGGATGAATGAGTCATGGGCCGCCATTGTTAAACAAAGGAGGAA<br/> GAATGATGACCACTCCAAGAATGATTTCTTGCAAGTTTTGCTCGATTCTGG<br/> GTTTCAAGTATCCCCAGATTGACGCCATGCTTCTGGAAACGTTTGGACCTGG<br/> TTCAGACACTAGTACCTCCACGATTGAATGGGCAATGGCAGAATTGCTGCG<br/> GAACCCAGAGAAGCTGGTAAAGGTCCGCGAGGAACTCGACAGGGTGATCA<br/> GAAGAAGCAACAATGTGAAGGAGTCTGATCTGCCAAACCTACCTTATCTCC<br/> ATGCCTGTGTCAAAGAGACCCTCAGGTTACACCCTCCGGTCACCTTCCTTC<br/> TTCCACACCGAGCAATGGAACCTTGTCAAATGATGAATTACACGATTCCAAA<br/> GGGATGCCAACTGATGGTAAACACATATGCAATTGGAAGAGATTCCAAGAC<br/> ATGGGAGAAACCCTTGTCTTTCTTGCCAGAACGATTTCTGAACTCAGAACTT<br/> GATTACCAAGGTAACGATTTCCAGTACATACCATTTGGTGCCGGCAGAAGA<br/> ATCTGTCCAGGGTTGTCATTGGCAACTCGAGTTGTTGACTGATACTCGCT<br/> TCTCTTCTCCACACTTTTATTGGAGCCTTCTGATGGAATGCACCCAGAT<br/> GAGCTAGACATGAACGATAAGTTTGGGCTGGCTCTCCAGAAGGACATCCC<br/> TCTGGTAGTCATTCCCAAGTTGAGGAAGTAA </p> |
|---------|---------------------------------------------------------------------------------------------------------------------------------------------------------------------------------------------------------------------------------------------------------------------------------------------------------------------------------------------------------------------------------------------------------------------------------------------------------------------------------------------------------------------------------------------------------------------------------------------------------------------------------------------------------------------------------------------------------------------------------------------------------------------------------------------------------------------------------------------------------------------------------------------------------------------------------------------------------------------------------------------------------------------------------------------------------------------------------------------------------------------------------------------------------------------------------------------------------------------------------------------------------------------------------------------------------------------------------------------------------------------------------------------------------------------------------------------------------------------------------------------------------------------------------------------------------------------------------------------------------------------------------------------------------------------------------------------------|

**Table S3.** The list of primers for qRT-PCR

| Target genes | Forward Primer (5'-3')        | Reverse Primer (5'-3')          | PCR product size (bp) | Template                                                                                 |
|--------------|-------------------------------|---------------------------------|-----------------------|------------------------------------------------------------------------------------------|
| NCS          | TGCCTGCTGACGATATTTGG<br>G     | GTGCCGACCGTTCCATCA<br>C         | 121                   | Consensus sequence from 7 isoforms of NCS (Vimolmangkang, Deng et al. 2016) <sup>1</sup> |
| CNMT         | TGCCATCAAGACCGACTTAC<br>CAAAG | GATCTGTGCCCTCTCACA<br>GTACAG    | 175                   | Consensus sequence from 2 isoforms of isolated CNMT                                      |
| 6OMT         | TCCGATGTGCCATTGAGCTG<br>G     | GTAACGCATTAACCTGTG<br>CAAGTG    | 134                   | Consensus sequence from 4 isoforms of isolated 6OMT                                      |
| ACTIN        | GGTGCTGAGTTCGTCGTAGA          | TGGGAATGATGTTGAAGG<br>AA        | 120                   | XM_010267617                                                                             |
| WRKY1        | ATAAGGCTGTTGGAGCAAGA<br>GT    | CTGTGGATCGTCTGCATC<br>TCT       | 191                   | NNU_11881RA                                                                              |
| WRKY2        | GACACAGCATCTGTCACTCA<br>TG    | GACGTCCCCTGACAACAT<br>GAA       | 211                   | NNU_05136RA                                                                              |
| WRKY3        | CGGTGAAGAACAGTCCAAAC<br>C     | GTTGTAATAAACACACA<br>CGGGC      | 161                   | NNU_09891RA                                                                              |
| WRKY4        | TCTGCAGAAGCCACTCTTGT          | GAATATCTTCTGTGCTCC<br>GCGT      | 190                   | NNU_01372RA                                                                              |
| WRKY5        | GAAACAATCCACCTGGGTTC<br>TTAGG | ACGTGGCTTCTTGTTTGA<br>AAAGC     | 190                   | NNU_22208RA                                                                              |
| WRKY6        | ATCTTAATGACACCAGTCCA<br>GCT   | CTGATTTTCTTCTGATCAC<br>CCTTCTTA | 166                   | NNU_02028RA                                                                              |
| WRKY7        | AGTCTCACTTCCAACAACAG<br>C     | GATCATCATATCCGAAGG<br>AACGACA   | 188                   | NNU_05834RA                                                                              |
| WRKY8        | GGCGCCGATGCAATTGAC            | CGTGGTCTCTGATAAAAAG<br>AAGTTGC  | 173                   | NNU_13849RA                                                                              |
| WRKY9        | GCCGGAAAATTCGCCAATCA<br>A     | GACAGTGGTGTGAGTG<br>CC3         | 190                   | NNU_24385RA                                                                              |
| WRKY10       | CATGAGATGGAGGAGCTCAC<br>C     | CGACGAAGCTCATGTCCA<br>GAC       | 169                   | NNU_12194RA                                                                              |
| CYP80G2      | CTCATGTGGCTGCTGTGGAA          | GCTTGAATATCCAACATC<br>TTGGTAGAG | 193                   | XM_010255688.1                                                                           |

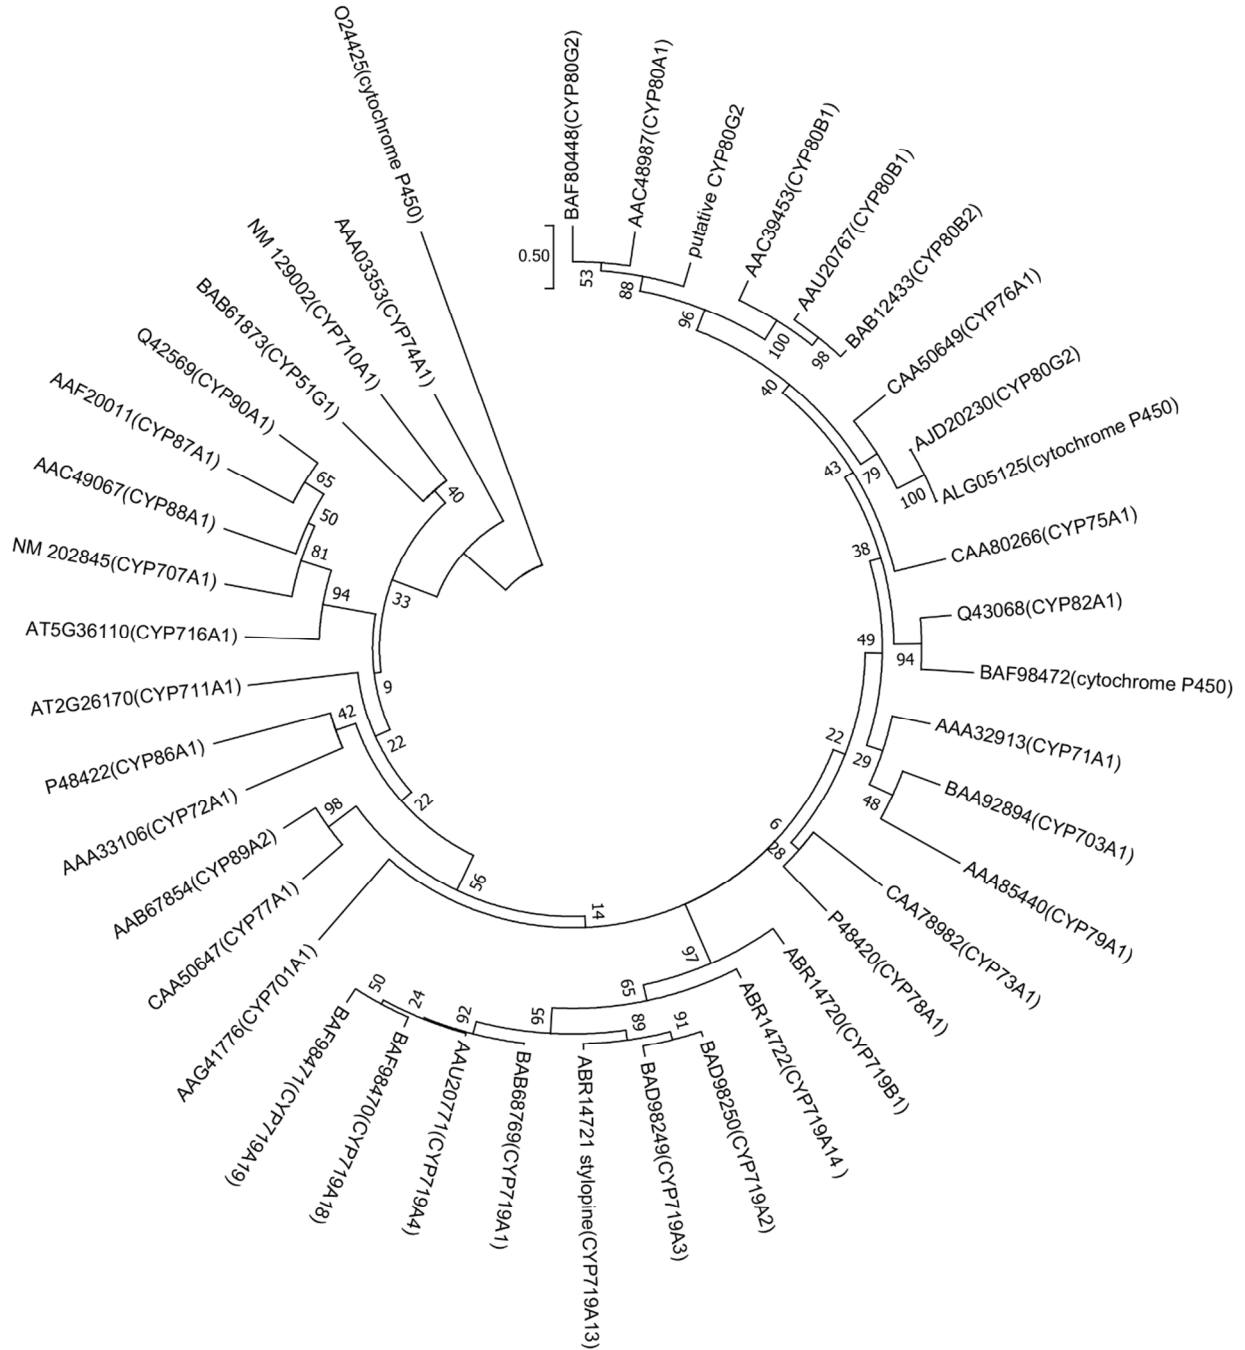

**Figure S1.** Phylogenetic tree of deduced amino acid sequences of 60 WRKY TF sequences retrieved from lotus genome analyzed with secondary metabolite-related WRKY from GenBank. Molecular phylogenetic analysis was constructed by Maximum Likelihood method based on the JTT matrix-based model conducted in MEGA7. The bootstrap consensus tree inferred from 1000 replicates.

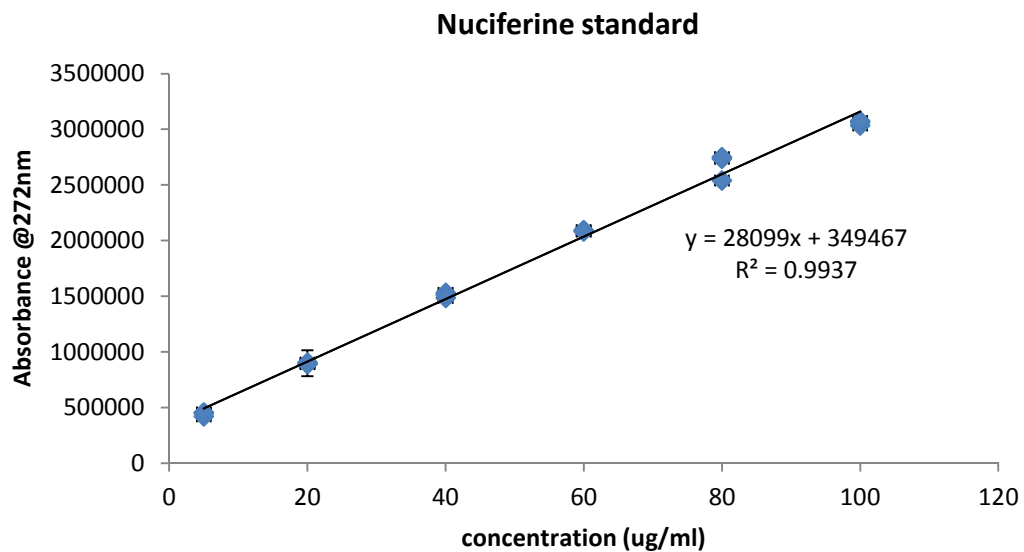

**Figure S2.** Linearity of calibration curve of nuciferine standard. The absorbance was recorded at 272nm and column temperature was controlled at 30°C. Each standard concentration was conducted in triplicate.

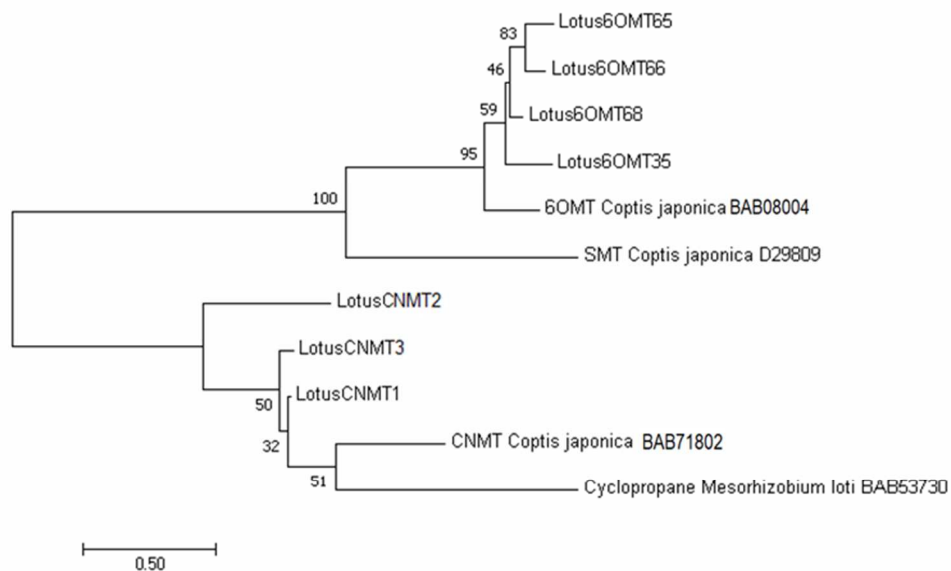

**Figure S3.** Phylogenetic tree of deduced amino acid sequences of isolated 6OMT and CNMT analyzed with plant *S*-adenosyl-*L*-methionine-dependent methyltransferases (SAM). Molecular phylogenetic analysis was constructed by Maximum Likelihood method based on the JTT matrix-based model conducted in MEGA7. The bootstrap consensus tree inferred from 1000 replicates.
